# Supplementary material for: Enhancement of guest-responsivity by mesocrystallization of porous coordination polymers
Source: Royal Society of Chemistry journal article supplement (doi:10.1039/c7tc00751e), 2017-01-01
Supplement: c7tc00751e1.pdf [file c7tc00751e1.pdf]

## Supporting Information

### Enhancement of Guest-Responsivity by Mesocrystallization of Porous Coordination Polymers

Akio Mishima, Tomomi Koshiyama, Jose A. Real and Masaaki Ohba

M. Ohba: [ohba@chem.kyushu-univ.jp](mailto:ohba@chem.kyushu-univ.jp)

### 1-bulk

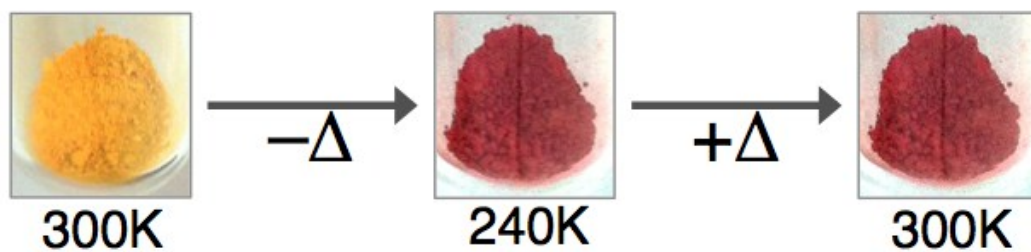

### 1-mesoW5

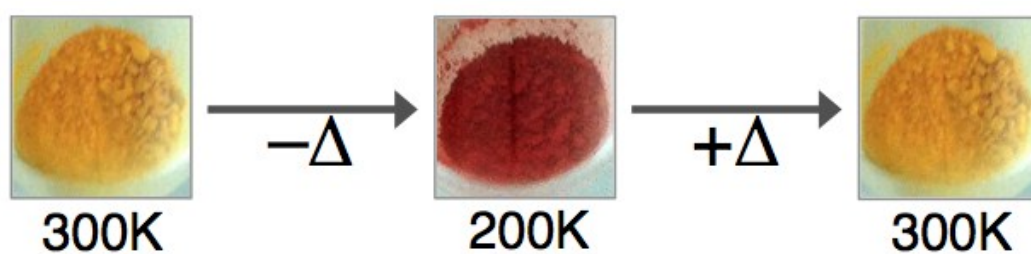

### 1-mesoW3

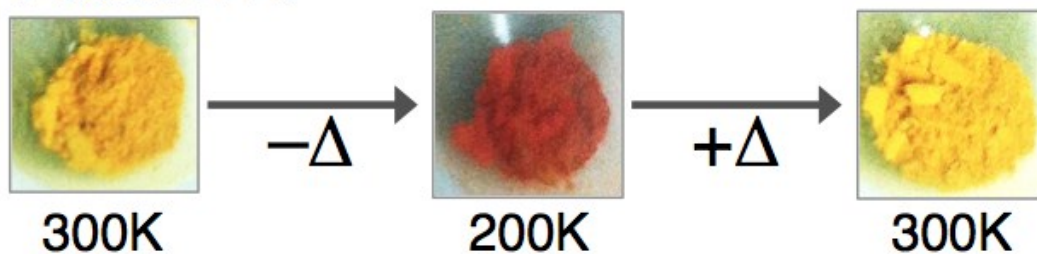

Figure S1 Thermal color changes of 1-bulk, 1-mesoW5 and 1-mesoW3.

### 1-bulk at 300 K

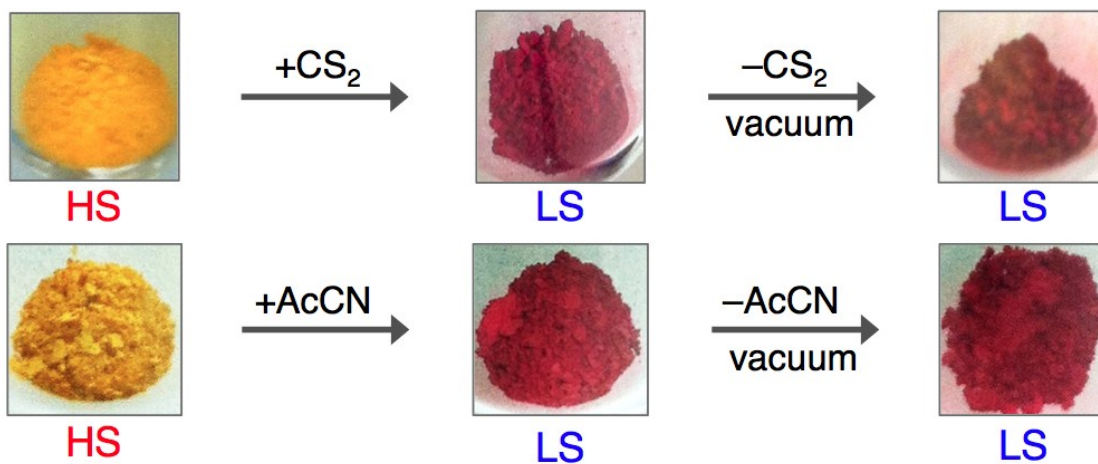

### 1-mesoW5 at 300 K

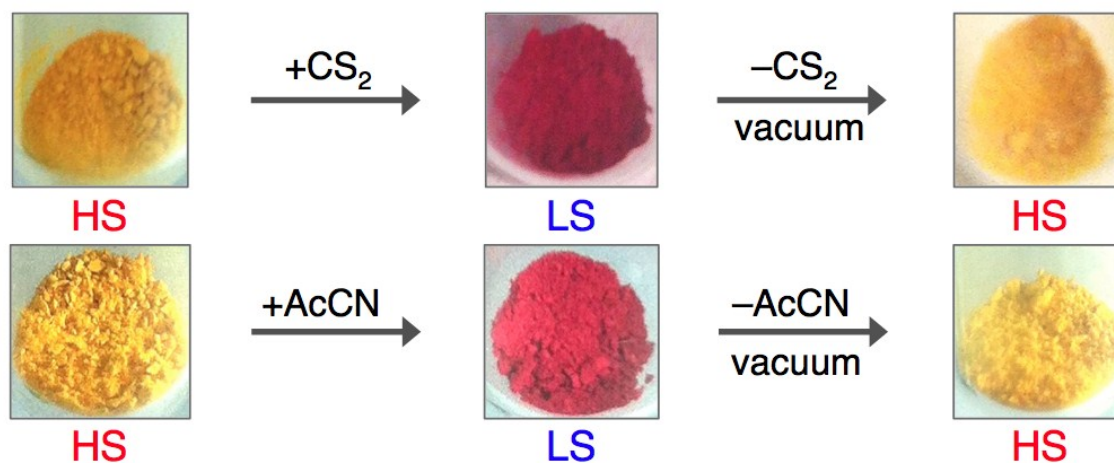

### 1-mesoW3 at 300 K

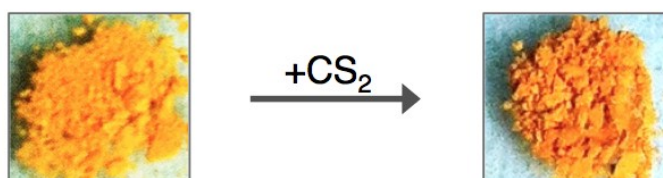

Figure S2 Responsivity of 1-bulk, 1-mesoW5 and 1-mesoW3 for CS<sub>2</sub> and AcCN.

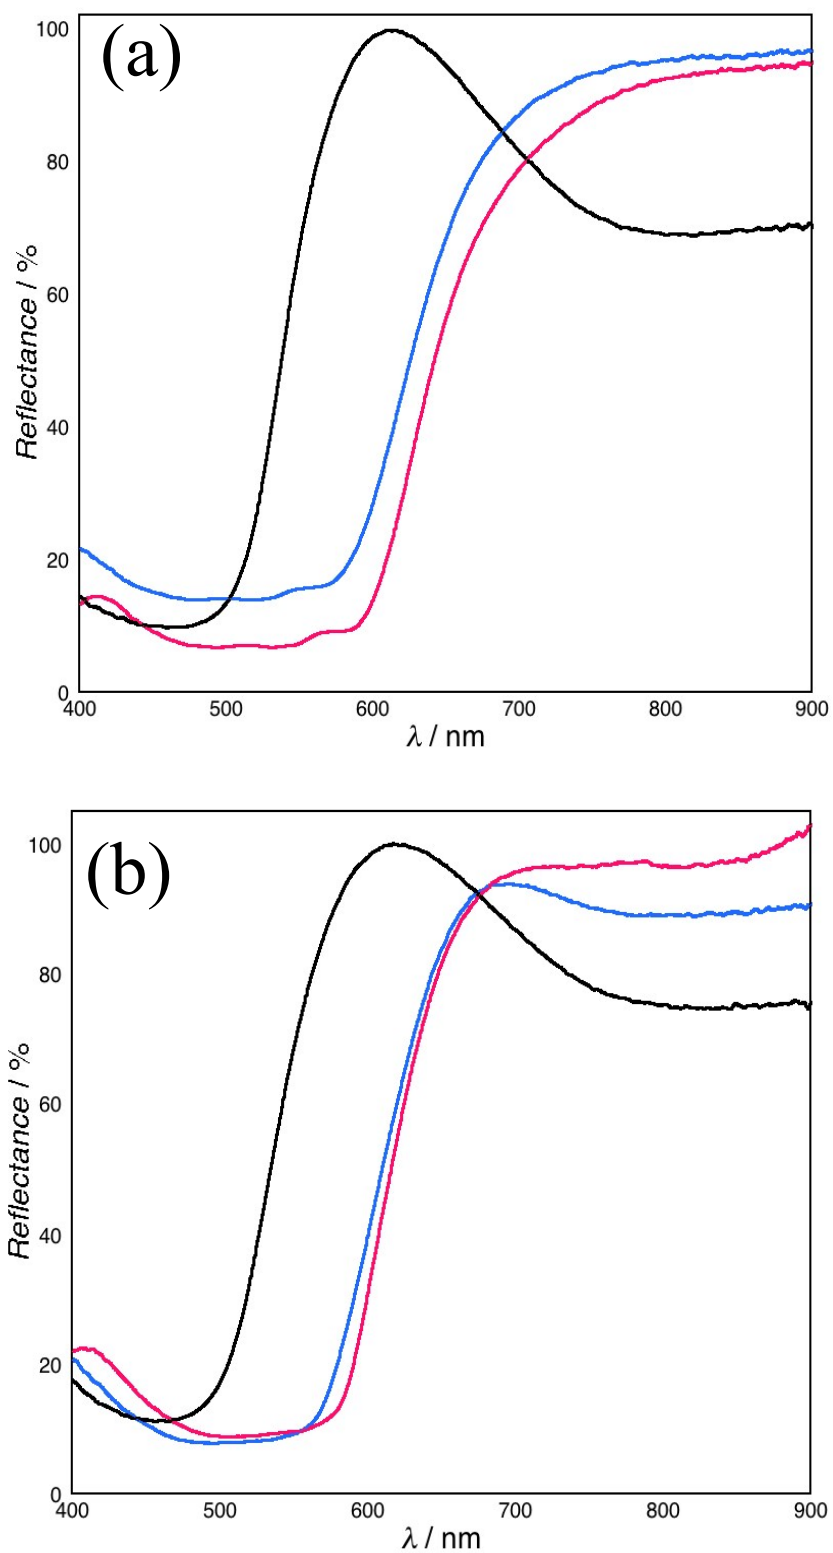

**Figure S3** Reflection spectra in the solid state of **1**-bulk (a) and **1**-mesoW5 (b): CS<sub>2</sub> clathrate (red line), AcCN clathrate (blue line) and guest-free sample in the HS state (black line).

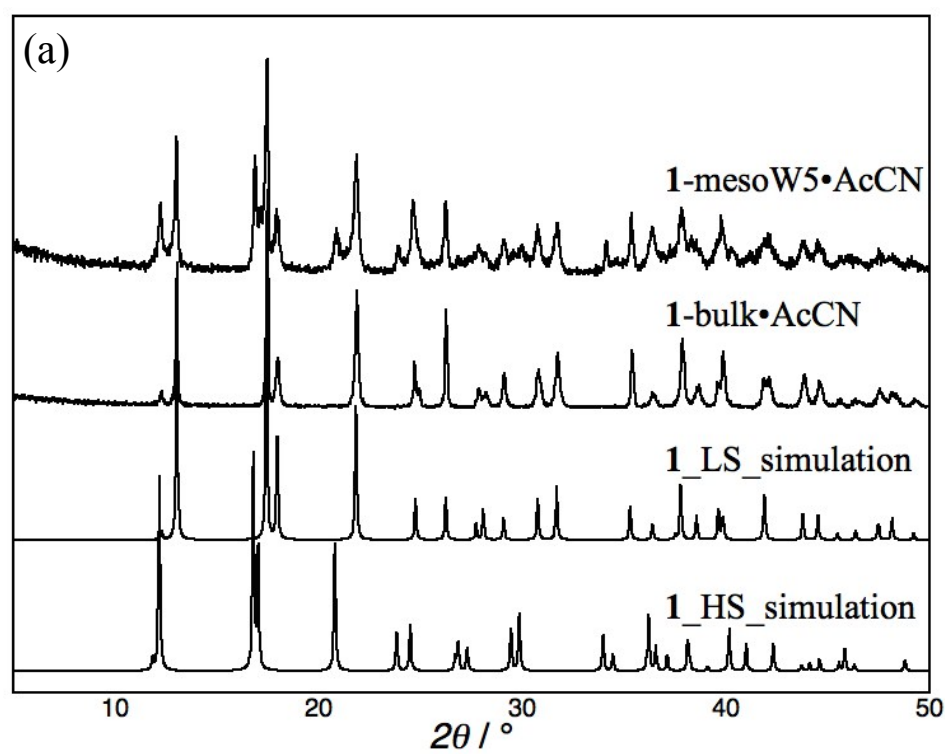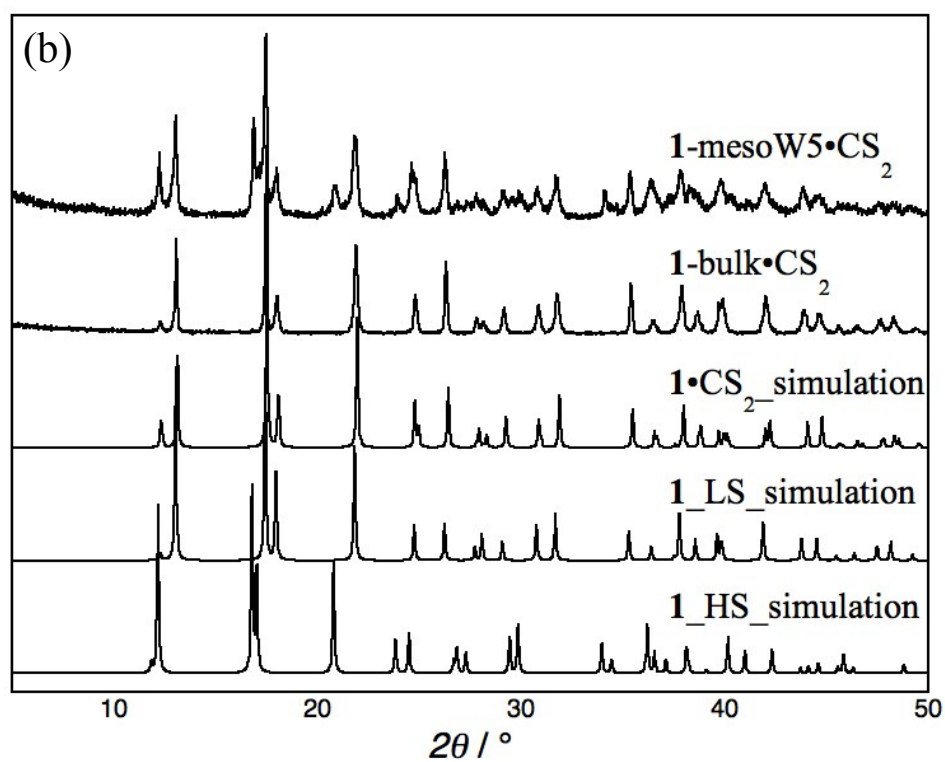

**Figure S4** PXRD patterns of (a) CS<sub>2</sub> clathrate and (b) AcCN clathrate of 1-bulk, 1-mesoW5 and 1-mesoW3

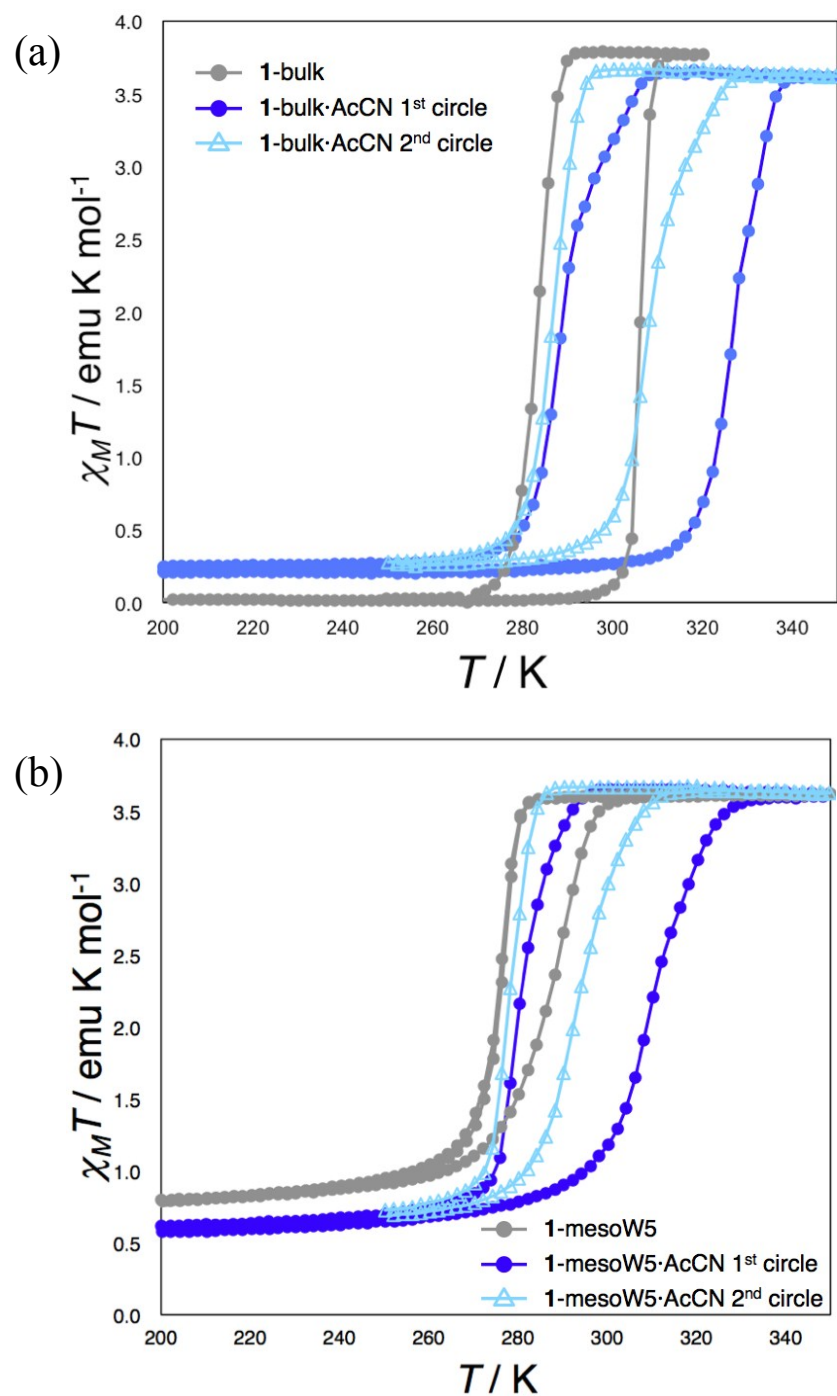

**Figure S5** Magnetic behavior of **1-bulk** (a) and **1-mesoW5** (b) clathrated AcCN

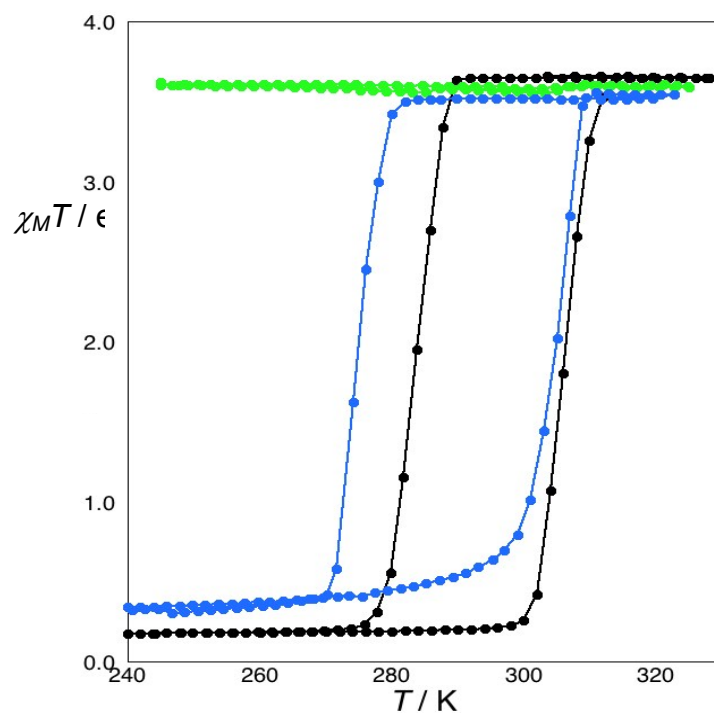

**Figure S6**  $\chi_M T$  versus  $T$  plots for these suspensions; 1-bulk (black), 1-bulk·2H<sub>2</sub>O (blue), 1-bulk·4.8H<sub>2</sub>O (green). 1-bulk·4.8H<sub>2</sub>O prepared under high humidity condition ( $P/P_0 > 0.9$ ) at 298 K showed no spin transition.

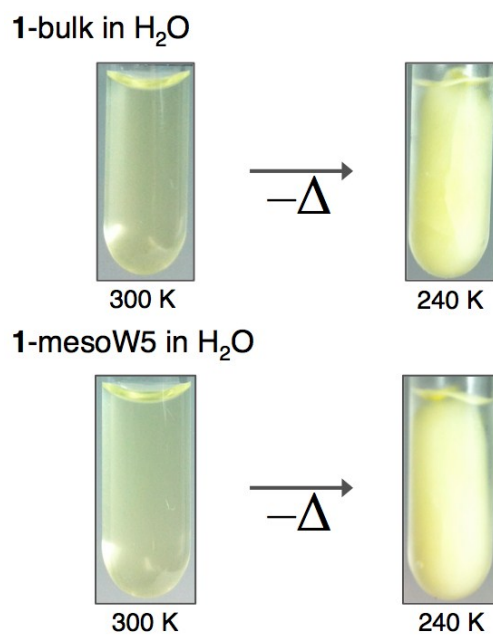

**Figure S7** The photographs of 1-bulk and 1-mesoW5 aqueous suspensions at 300 K and 240 K



**1-bulk in H<sub>2</sub>O 1.0 mM + AcCN aq. (293K, 6h)**

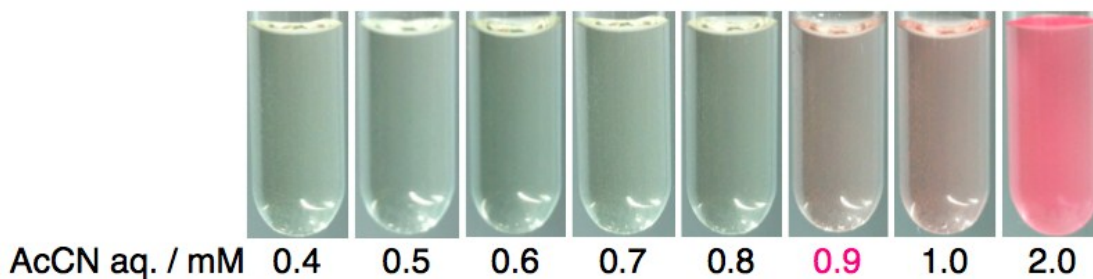

**1-mesoW5 in H<sub>2</sub>O 1.0 mM + AcCN aq. (293K, 6h)**

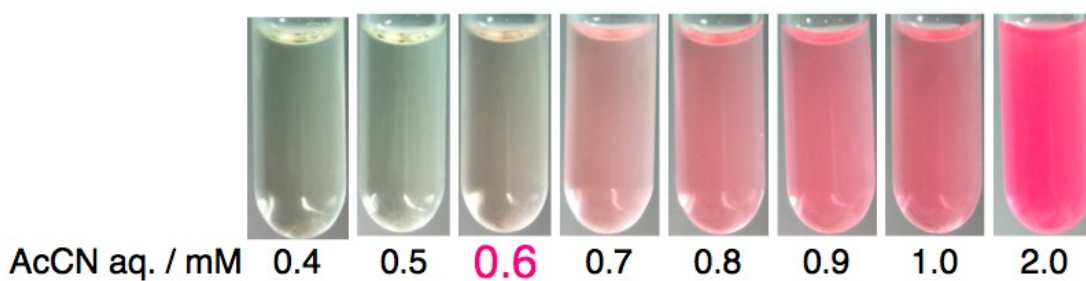

**Figure S8** Photographs of **1-bulk** (top) and **1-mesoW5** (down) suspensions controlled varying AcCN concentration
